# Supplementary material
Source: PubMed Central journal article supplement (PMC3030624)
Supplement: NIHMS256511-supplement-01.pdf [file NIHMS256511-supplement-01.pdf]

Supplemental Information

**Supplemental Figure 1.** Oligomeric state of caspase-6 cleavage variants. (a) Size exclusion chromatography of caspase-6 cleavage variants. Presence of the prodomain or intersubunit linker and calculated monomer molecular weight (MW) in each of the constructs is indicated. (b) Sedimentation velocity by analytical ultracentrifugation. ND Not determined.

| <u>Prodomain</u>   | <u>Linker</u> | Monomer<br>MW<br>(kDa) |
|--------------------|---------------|------------------------|
| FLUC               |               |                        |
| Yes                | Yes           | 34                     |
| D23A D179A         |               |                        |
| Yes                | Yes           | 34                     |
| D23A D179 CT       |               |                        |
| Yes                | No            | 32                     |
| $\Delta$ N D179A   |               |                        |
| No                 | Yes           | 32                     |
| $\Delta$ N D179 CT |               |                        |
| No                 | No            | 30                     |

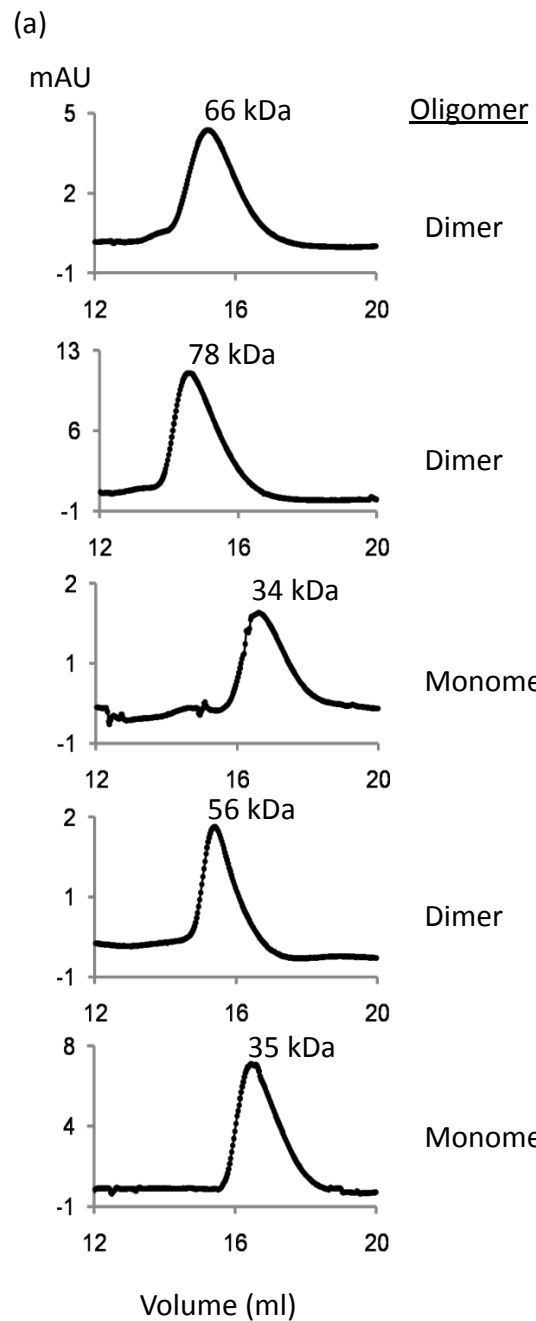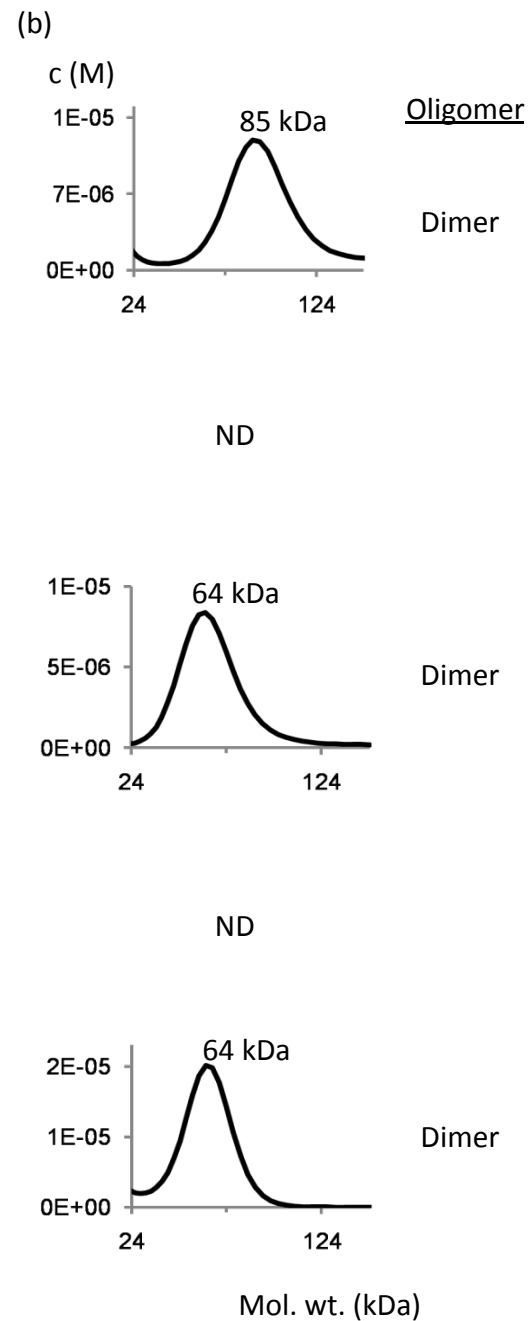

Supplemental Figure S1
